# Supplementary material
Source: publisher figshare collection journal article supplement (https://gsapubs.figshare.com/articles/dataset/_/12542960)
Supplement: Supplementary file 1 [file 1]

1 **Strain and retrogression partitioning explain long-term stability of crustal roots in stable continents**2 Bénédicte Cenki-Tok<sup>1,2</sup>, P.F. Rey<sup>2</sup> and D. Arcay<sup>1</sup>3  
4 TABLE DR1. THERMAL AND MECHANICAL PARAMETERS

| Parameter                                                    | Continental Crust          | Retrogressed Amphibolites  | Garnet-Pyroxene CC                | Upper Mantle            | Fault                           |
|--------------------------------------------------------------|----------------------------|----------------------------|-----------------------------------|-------------------------|---------------------------------|
| Reference temperature (K)                                    | 293                        | 293                        |                                   |                         |                                 |
| Dislocation creep viscous rheology                           | Wet quartzite <sup>a</sup> | Wet quartzite <sup>a</sup> | Dry Maryland Diabase <sup>b</sup> | Wet dunite <sup>c</sup> | 0.1 *Wet quartzite <sup>a</sup> |
| Reference density (kg·m <sup>-3</sup> )                      | 2600                       | 2600                       | 2950                              | 3370                    | 2600                            |
| Thermal expansivity (K <sup>-1</sup> )                       | -1.00E-04                  | -1.00E-04                  | -1.00E-04                         | 2.80E-05                | -1.00E-04                       |
| Compressibility (Pa <sup>-1</sup> )                          | 8.00E-11                   | 8.00E-11                   | -                                 | -                       | 8.00E-11                        |
| Heat capacity (J K <sup>-1</sup> kg <sup>-1</sup> )          | 1000                       | 1000                       | 1000                              | 1000                    | 1000                            |
| Thermal diffusivity (m <sup>2</sup> s <sup>-1</sup> )        | 9E-07                      | 9E-07                      | 9E-07                             | 9E-07                   | 9E-07                           |
| Latent heat of fusion (kJ kg <sup>-1</sup> K <sup>-1</sup> ) | 250                        | 250                        | 250                               | -                       | 250                             |
| Radiogenic heat production (W m <sup>-3</sup> ) <sup>d</sup> | 5.00E-07                   | 5.00E-07                   | 5.00E-07                          | -                       | 5.00E-07                        |
| Melt fraction density change <sup>e</sup>                    | 0.13                       | 0.13                       | -                                 | -                       | 0.13                            |
| Solidus term 1 (K)                                           | 923                        | 923                        | 1063                              | -                       | 923                             |
| Solidus term 2 (K Pa <sup>-1</sup> )                         | -1.20E-07                  | -1.20E-07                  | -1.20E-07                         | -                       | -1.20E-07                       |
| Solidus term 3 (K Pa <sup>-2</sup> )                         | 1.20E-16                   | 1.20E-16                   | 1.20E-16                          | -                       | 1.20E-16                        |
| Liquidus term 1 (K)                                          | 1423                       | 1423                       | 1563                              | -                       | 1423                            |
| Liquidus term 2 (K Pa <sup>-1</sup> )                        | -1.20E-07                  | -1.20E-07                  | -1.20E-07                         | -                       | -1.20E-07                       |
| Liquidus term 3 (K Pa <sup>-2</sup> )                        | 1.60E-16                   | 1.60E-16                   | 1.60E-16                          | -                       | 1.60E-16                        |
| Friction coefficient                                         | 0.44                       | 0.44                       | 0.44                              | 0.44                    | 0.44                            |
| Softened friction coefficient                                | 0.088                      | 0.088                      | 0.088                             | 0.088                   | 0.088                           |
| Cohesion (MPa)                                               | 15                         | 15                         | 15                                | 15                      | 1.5                             |
| Softened cohesion (MPa)                                      | 3                          | 3                          | 3                                 | 3                       | 0.3                             |
| Pre-exponential factor (MPa <sup>-n</sup> s <sup>-1</sup> )  | 5.00E-06                   | 5.00E-06                   | 5.05E-22                          | 70000                   | 5.00E-06                        |
| Stress exponent (n)                                          | 3                          | 3                          | 4.7                               | 3                       | 3                               |
| Activation energy (kJ mol <sup>-1</sup> )                    | 190                        | 190                        | 485                               | 520                     | 190                             |
| Activation volume (m <sup>3</sup> mol <sup>-1</sup> )        | 0                          | 0                          | 0                                 | 0                       | 0                               |
| Water fugacity                                               | 0                          | 0                          | 0                                 | 0                       | 0                               |
| Water fugacity exponent <sup>f</sup>                         | 0                          | 0                          | 0                                 | 0                       | 0                               |
| Melt viscous softening factor                                | 1.00E-03                   | 1.00E-03                   |                                   |                         | 1.00E-03                        |
| Softening melt fraction interval                             | 0.2-0.3                    | 0.2-0.3                    |                                   |                         | 0.2-0.3                         |

*Additional parameters:*

Model Size: 360 km length (241 nodes, constant spacing) - 120 km thick (81 nodes, constant spacing) i.e. 15 km air-like material, 70 km crust, 35 km upper mantle. The marker density is uniform (60 per grid cell).

A weak prismatic region dipping 45 °C simulates a detachment in the upper crust

Basal heat flow is set at 0.015 W.m<sup>-2</sup>

Velocities tested: 1.8 cm.y<sup>-1</sup> (fast) or 0.18 cm.y<sup>-1</sup> (slow) and Isostasy is activated

Prograde amphibolite to garnet-pyroxene rock phase change set at 1050 K

Retrograde garnet-pyroxene rock to amphibolite phase change set at 1050 K and 10<sup>-14</sup> s<sup>-1</sup> strain rate

Moho temperature at the start of the model is 883 °C

Solidus and liquidus are defined by a polynomial function of pressure (P):

$$T_s = a_0 + a_1 \times P + a_2 \times P^2, T_l = b_0 + b_1 \times P + b_2 \times P^2$$

The density of the continental crust changes according to T and P:

$$\rho = \rho_0 * (1 + (\beta * \Delta P) - (\alpha * \Delta T))$$

Note that the presence of melt has an impact on density.

The maximum melt fraction is 30%.

---

*References:*

a Parameters were derived from Brace and Kohlstedt (1980)

b Parameters were derived from Mackwell et al (1998)

c Parameters were derived from Brace and Kohlstedt (1980)

d Parameters were derived from Hasterok and Chapman (2011)

e Melt and other parameters were derived from Rey and Muller (2010)

f A zero value denotes that this effect on the viscous flow law is incorporated into the pre-exponential factor

---

Figure DR1: Slow modeling results ( $0.18 \text{ cm.y}^{-1}$  extension speed) at an average strain rate of  $3\text{e-}16 \text{ s}^{-1}$  and 25 % extension. Colors are the same as in Fig. 2. Conditions for a, b and c models are the same as in Fig. 3.

Figure DR2: Fast modeling results ( $1.8 \text{ cm.y}^{-1}$  extension speed) at an average strain rate of  $3\text{e-}15 \text{ s}^{-1}$  and 25 % extension. Colors are the same as in Fig 3. Variations of model shown on Figure 3b but a. only the prograde phase change is allowed. Retrogression does not occur, and the crust, including the garnet-pyroxene layer, thins homogeneously. b. The strain rate threshold for retrogression has been set to  $10^{-13} \text{ s}^{-1}$ . Retrogression does not occur, and the crust, including the garnet-pyroxene layer, thins homogeneously. c. The strain rate threshold for retrogression has been set to  $10^{-15} \text{ s}^{-1}$ , large portions of retrogressed and partially molten crust are exhumed in the center of the model whereas the garnet-pyroxene layer is preserved locally but strongly thinned.

#### REFERENCES CITED:

- Brace, W.F., and Kohlstedt, D.L., 1980, Limits on lithospheric stress imposed by laboratory experiments: *Journal of Geophysical Research*, v. 85, p. 6248-6252.
- Hasterok, D., Chapman, D., 2011. Heat production and geotherms for the continental lithosphere. *Earth Planet. Sci. Lett.* 307 (1), 5970.
- Mackwell, S. J., Zimmerman, M. E., & Kohlstedt, D. L. (1998). High-temperature deformation of dry diabase with application to tectonics on Venus. *Journal of Geophysical Research: Solid Earth*, 103(B1), 975-984.
- Rey, P.F., Muller, R.D., 2010. Fragmentation of active continental plate margins owing to the buoyancy of the mantle wedge. *Nat. Geosci.* 3 (4), 257–261.

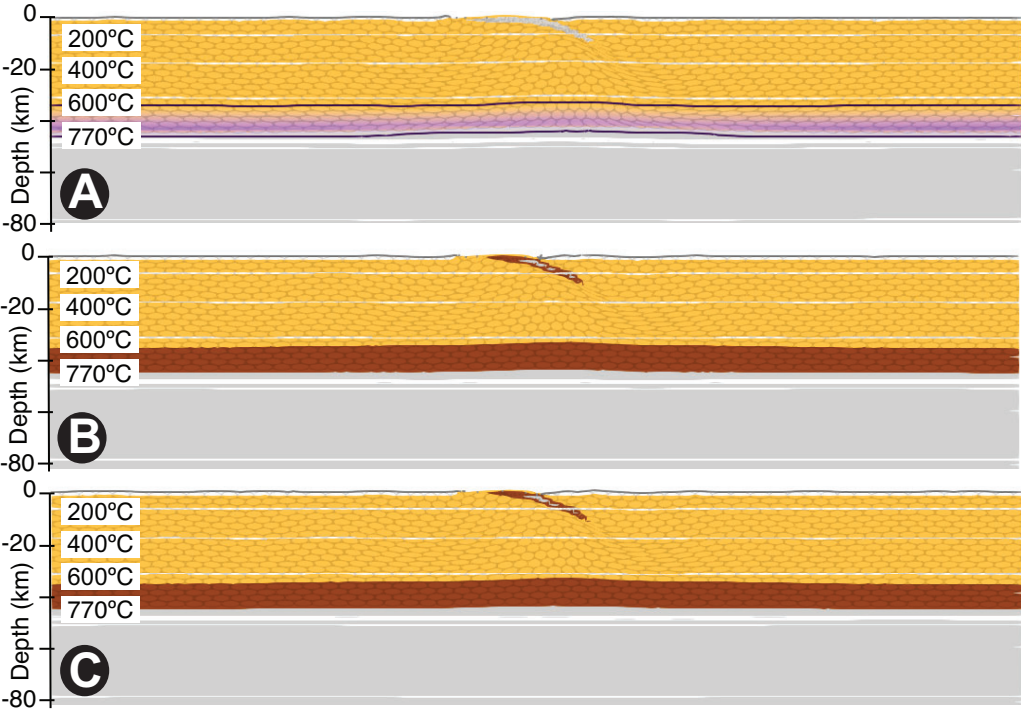

Fig. DR1

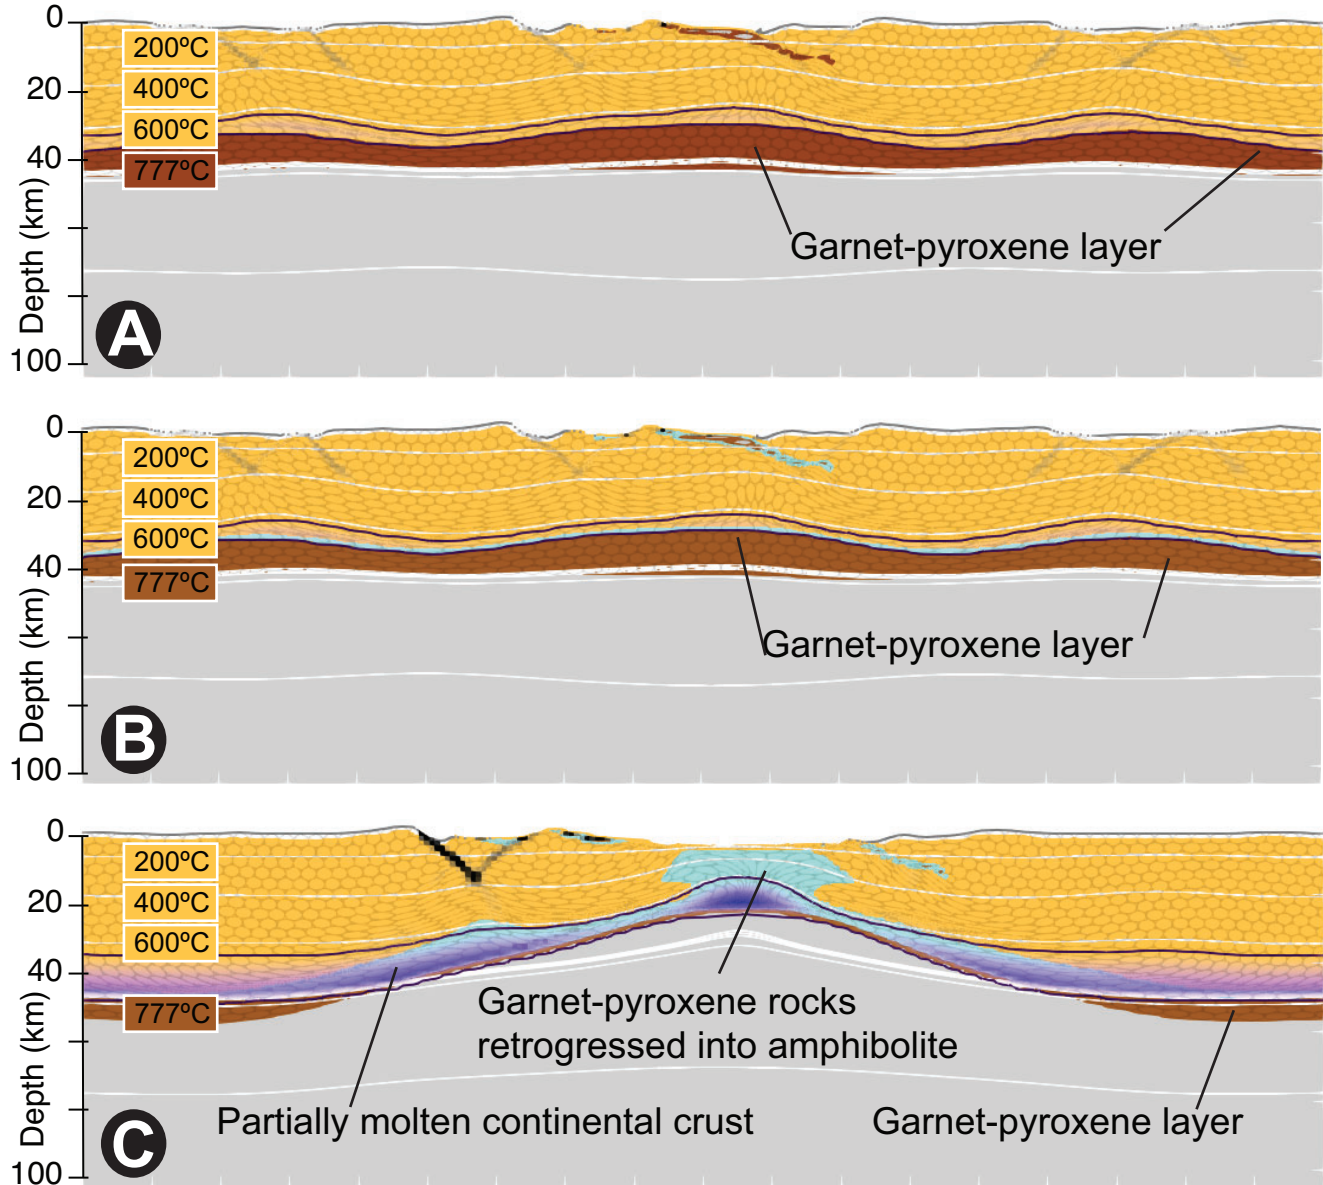

Fig. DR2
